# Supplementary material for: Midline Signalling Systems Direct the Formation of a Neural Map by Dendritic Targeting in the Drosophila Motor System
Source: PLoS Biol. 2009 Sep 22;7(9):e1000200. doi: 10.1371/journal.pbio.1000200 (PMC2736389; doi:10.1371/journal.pbio.1000200)
Supplement: Table S1 — Neuromuscular connectivity of the internal abdominal muscle field. The table lists the names of glutamatergic type-Ib and type-Is motorneurons and their targets within the internal muscle field. Peptidergic/modulatory motorneurons also innervating these muscles, such as the V-neuron (innervates muscle VL1 with type-III boutons) or the VUM neurons (type-II boutons, one innervating the ventral, another the set of dorsal internal muscles) have not been listed. For muscle VL1 we have not been able to identify a unique type-Ib motorneuron at 15 h and 18 h AEL, only innervation by RP5, the common exciter, a VUM neuron and the V-neuron. Our observations are largely in agreement with recent studiesc. Corroborative references are provided for those motorneuron-muscle pairs where there had previously been inconsistencies on their connectivity either among these studies or with this work. References: a [84], b [85], c [3], d [86]. (0.02 MB XLS) [file pbio.1000200.s005.xls]

## Sheet: Sheet1
Motorneuron	Target muscle(s)
Specific exciters (type Ib boutons)	According to Bate (1993) [82]	According to Crossley (1978) [83]
MN-DO1 (U)	DO1	9
MN-DO2 (U)	DO2	10
MN-DO3	DO3	11
MN-DO4	DO4	19
MN-DO5	DO5	20
MN-DA1 (aCC)	DA1	1
MN-DA2 (U)	DA2	2
MN-DA3 (U)	DA3	3
MN-LL1 (U)	LL1	4
none identified	VL1	12
MN-VL2 a, c	VL2	13
MN-VL3/4 (RP3)	VL3/4	6/7
MN-VO1 (RP4) a, b, c	VO1	14.1
MN-VO2 (RP1) a, b, c	VO2	14.2
MN-VO3	VO3	28
MN-VO4/5	VO4/5	15/16
MN-VO4-6 a, c	VO4-6	15-17
Common exciters (type Is boutons)
RP2 a, b, c	all DO’s, all DA’s, LL1	1-4, 9-11, 19, 20
RP5 a, b, c, d	all VL’s, all VO’s except VO3+VO6	6, 7, 12-16
